# Supplementary material for: Resource Use and Real-World Outcomes for Ranibizumab Treat and Extend for Neovascular Age-Related Macular Degeneration in the UK: Interim Results from TERRA
Source: PubMed Central journal article supplement — Ophthalmol Ther. 2017 May 15;6(1):175–86. doi: 10.1007/s40123-017-0091-9 (PMC5449310; doi:10.1007/s40123-017-0091-9), 2017-05-15
Supplement: 40123_2017_91_MOESM1_ESM.pdf [file 40123_2017_91_MOESM1_ESM.pdf]

**Supplementary Table 1. Overview of the operating cost questionnaire**

|                                          |                                                                                                                                                                                                                                                                                                                                                                                                                                                                                                                                                 |
|------------------------------------------|-------------------------------------------------------------------------------------------------------------------------------------------------------------------------------------------------------------------------------------------------------------------------------------------------------------------------------------------------------------------------------------------------------------------------------------------------------------------------------------------------------------------------------------------------|
| <b>Clinic overview</b>                   | <ul style="list-style-type: none"> <li>● One-stop (defined as monitoring and investigations conducted in the same clinic as ranibizumab is administered)</li> <li>● Two-stop (separate monitoring and treatment clinics)</li> <li>● Other (mixture of the above)</li> </ul>                                                                                                                                                                                                                                                                     |
| <b>Length of clinic</b>                  | Length of clinic (hours) for each type of clinic                                                                                                                                                                                                                                                                                                                                                                                                                                                                                                |
| <b>Staff resource use</b>                | <ul style="list-style-type: none"> <li>● Staff type (nurse, healthcare assistant, clinician, optometrist, ophthalmic photographers/ technicians, administrative coordinators, data collection &amp; management support staff, other administrative staff, other) <ul style="list-style-type: none"> <li>○ Post</li> <li>○ NHS grade/band</li> <li>○ Room (where staff is based)</li> <li>○ Roles in clinic</li> <li>○ Number of staff of that type involved in clinic</li> <li>○ Time spent by staff in a clinic session</li> </ul> </li> </ul> |
| <b>Length of patient spend at clinic</b> | “How long does the average patient spent in the clinic at each visit?” (in hours) for each clinic type                                                                                                                                                                                                                                                                                                                                                                                                                                          |
